# Supplementary material
Source: PubMed Central journal article supplement (PMC2980953)

**Neural-specific  $\alpha$ 3-fucosylation of N-linked glycans in the *Drosophila* embryo requires Fucosyltransferase A and influences developmental signaling associated with O-glycosylation**

Dubravko Rendić\*, Mary Sharrow\*, Toshihiko Katoh, Bryan Overcarsh, Khoi Nguyen, Joseph Kapurch, Kazuhiro Aoki, Iain B. H. Wilson and Michael Tiemeyer

**FIGURE LEGENDS FOR SUPPLEMENTARY DATA**

**Figure S1. Transcripts for FucTB and FucTD are not detected in the embryo.** Wild-type embryos (Oregon R) were probed with single-stranded, digoxigenin-labeled RNA probes specific for FucTB (A-D) or FucTD transcripts (E-H) as described for **Figure 2**. Specific hybridisation patterns were not detected for either probe. All embryos are oriented with their anterior ends to the left.

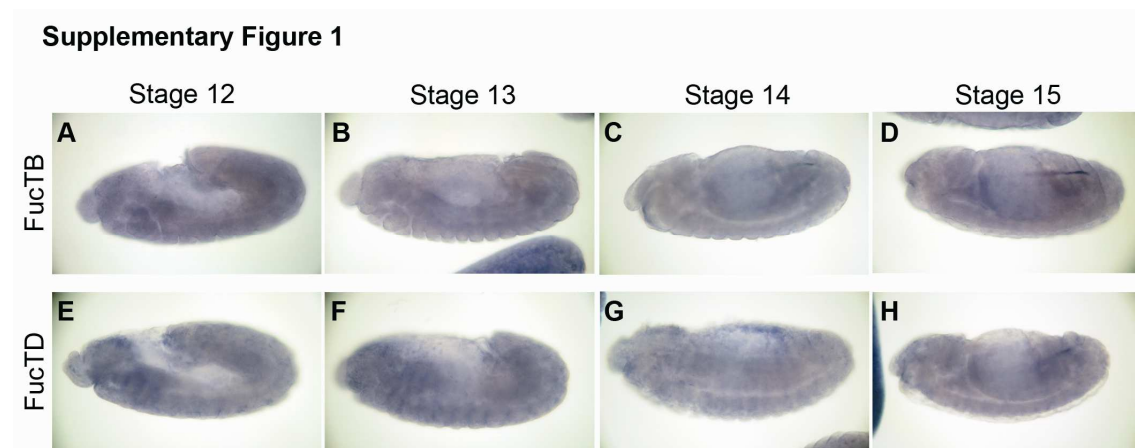

**Figure S2. *elav*-GAL4; UAS-FucTA but not -FucTB, -FucTC, or -FucTD embryos exhibit a neurogenic phenotype.** Expression of the four candidate  $\alpha$ 3-fucosyltransferases, each driven by ELAV, was assessed by in situ hybridization with enzyme-specific probes. (A) FucTA transcripts, detected by FucTA-specific probe, revealed enlarged peripheral neural clusters (arrow). These sensory clusters are barely detectable in the wild-type embryo (see **Figure 2G-H**) and are significantly smaller in *elav*-GAL4; UAS-FucTB (**B**), *elav*-GAL4; UAS-FucTC (**C**), or *elav*-GAL4; UAS-FucTD (**D**) embryos hybridised with their respective gene-specific probes.

**Supplementary Figure 2**

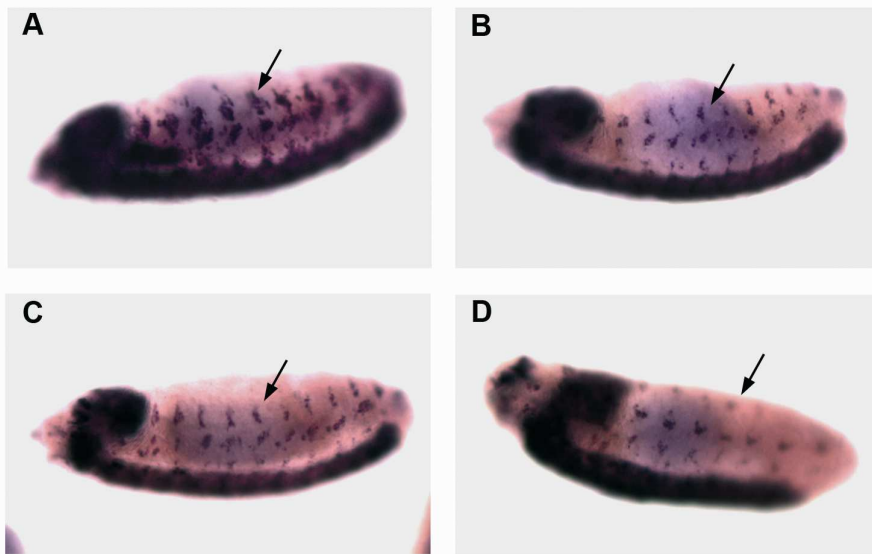

Supplement: supp_cwq119_cwq119_suppl.pdf [file supp_cwq119_cwq119_suppl.pdf]
